# Supplementary material for: pH-triggered solubility and cytotoxicity changes of malachite green derivatives incorporated in liposomes for killing cancer cells
Source: Royal Society of Chemistry journal article supplement (doi:10.1039/d0tb01346c), 2020-01-01
Supplement: d0tb01346c1.pdf [file d0tb01346c1.pdf]

Supplementary information for

**pH-triggered solubility and cytotoxicity changes of malachite green  
derivatives incorporated in liposomes for killing cancer cells**

**Authors**

Ryoko M. Uda,<sup>\*†</sup> Nao Yoshida,<sup>†</sup> Tomoyuki Iwasaki,<sup>‡</sup> and Keita Hayashi<sup>†</sup>

**Affiliation**

<sup>†</sup> Department of Chemical Engineering, National Institute of Technology, Nara College,  
22 Yata-cho, Yamatokoritama, Nara 639-1080, Japan

<sup>‡</sup> Division of Analytical Bio-medicine, Advanced Research Support Center, Ehime  
University, Shitsukawa, Toon, Ehime 791-0295, Japan

Corresponding author. Department of Chemical Engineering, National Institute of  
Technology, Nara College, 22 Yata-cho, Yamatokoritama, Nara 639-1080, Japan; TEL.:  
+81 0743 55 6164; fax: +81 0743 55 6169  
E-mail address: ryoko@chem.nara-k.ac.jp (Ryoko M. Uda).

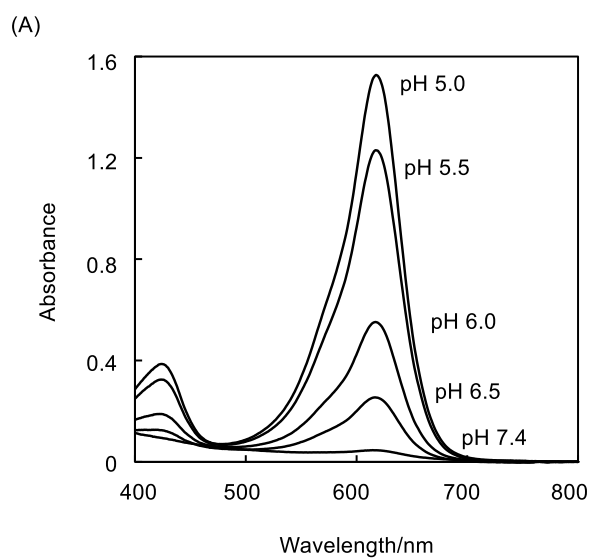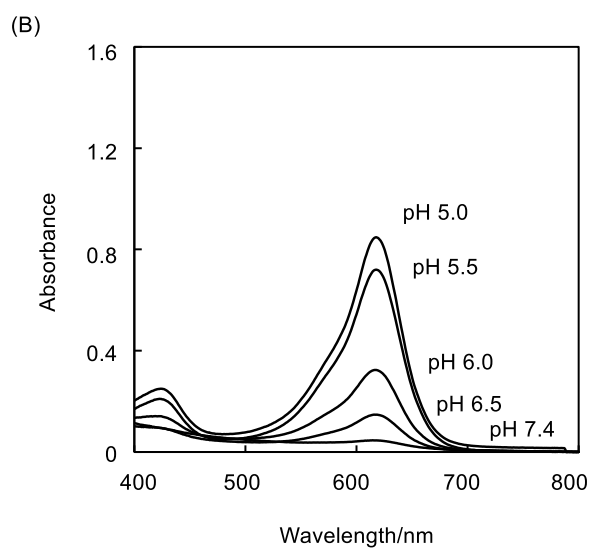

**Figure S1.** Absorption spectra of the MG-X liposomes after mixing with buffer solutions at various pH levels. (A) MG-OH/POPC liposome, (B) MG-OCH<sub>3</sub>/POPC liposome.

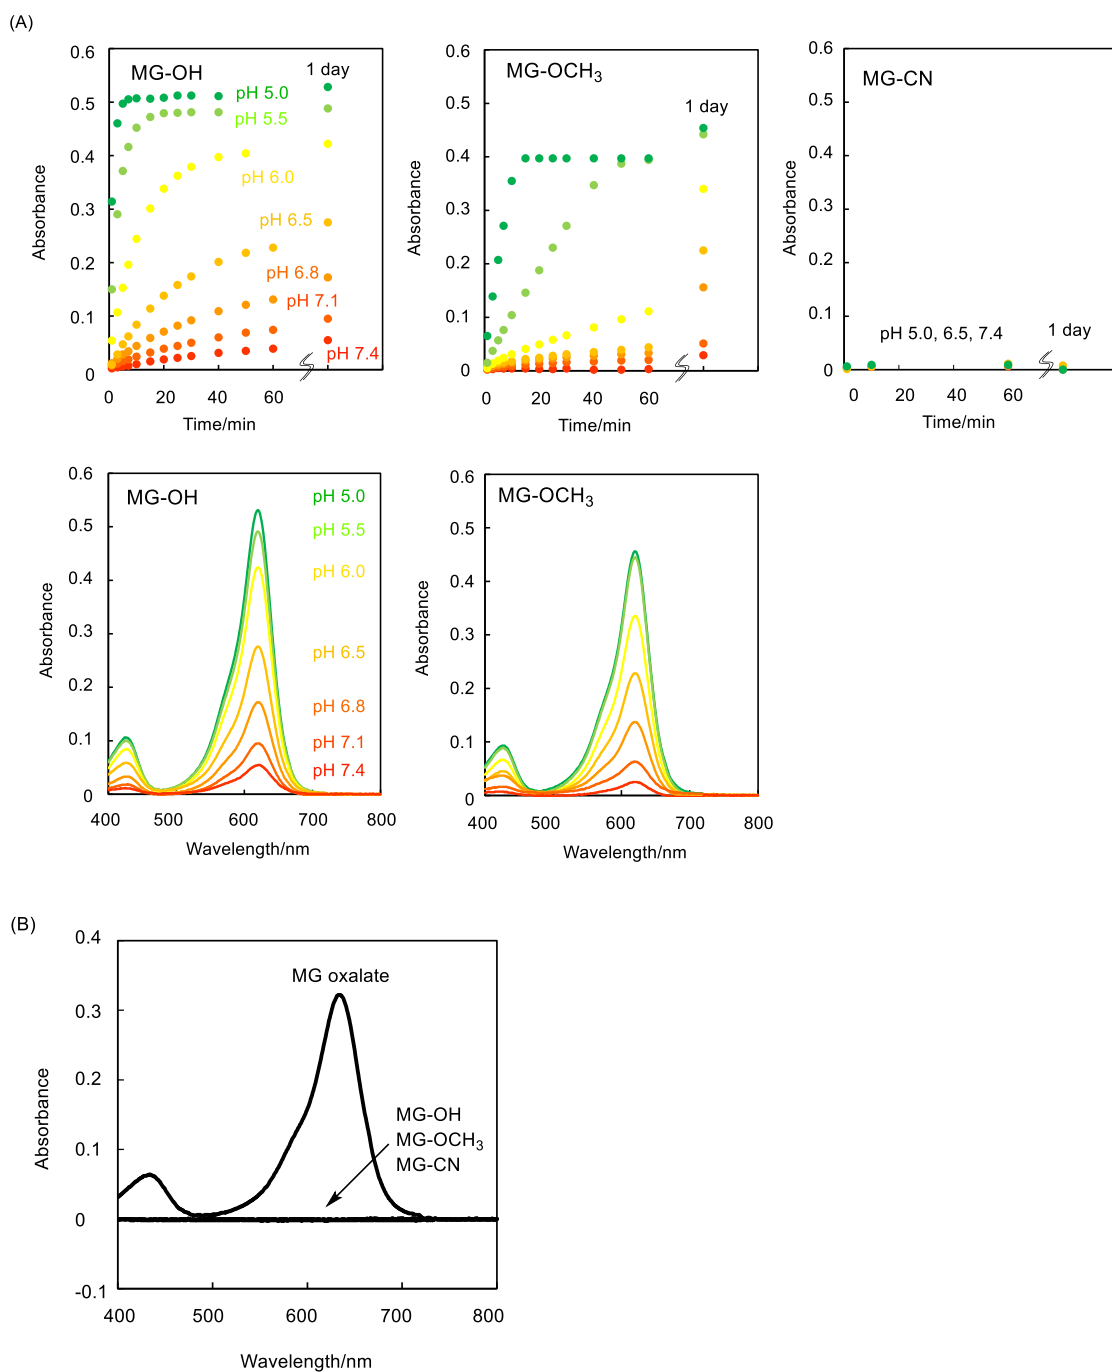

**Figure S2.** Time dependence of absorbance at 622 nm for DMSO solutions containing MG-X (0.1 mL) after mixing with buffer solutions at various pH levels (0.9 mL) and absorption spectra of the mixture at 1 day after mixing (A). The final concentration of MG-X was 50  $\mu\text{M}$ . Absorption spectra of the DMSO solutions containing malachite green derivatives (50  $\mu\text{M}$ ) (B). The optical length of the cuvette for the measurement was 1 mm.

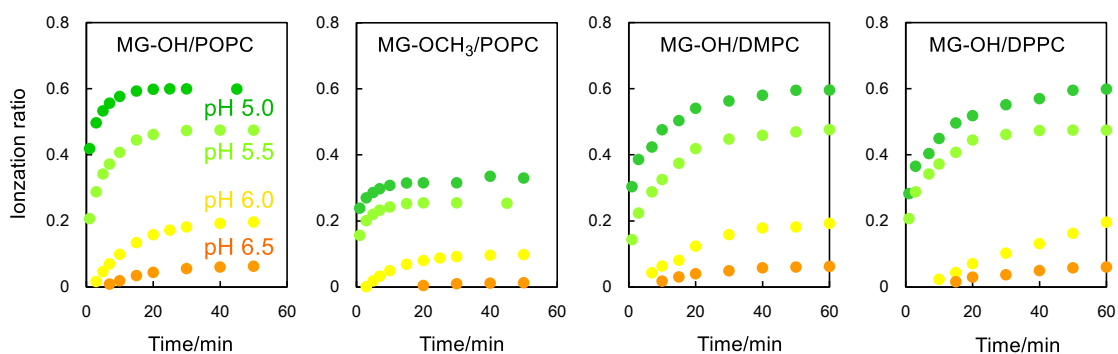

**Figure S3.** Ionization ratio of MG-OH and MG-OCH<sub>3</sub> in liposomes after mixing with buffer solutions at various pH levels (5.0-6.5). The ionization ratio of MG-CN was not obtained because the absorbance of MG-CN was too small to be applied to the calibration curves prepared for MG oxalate.

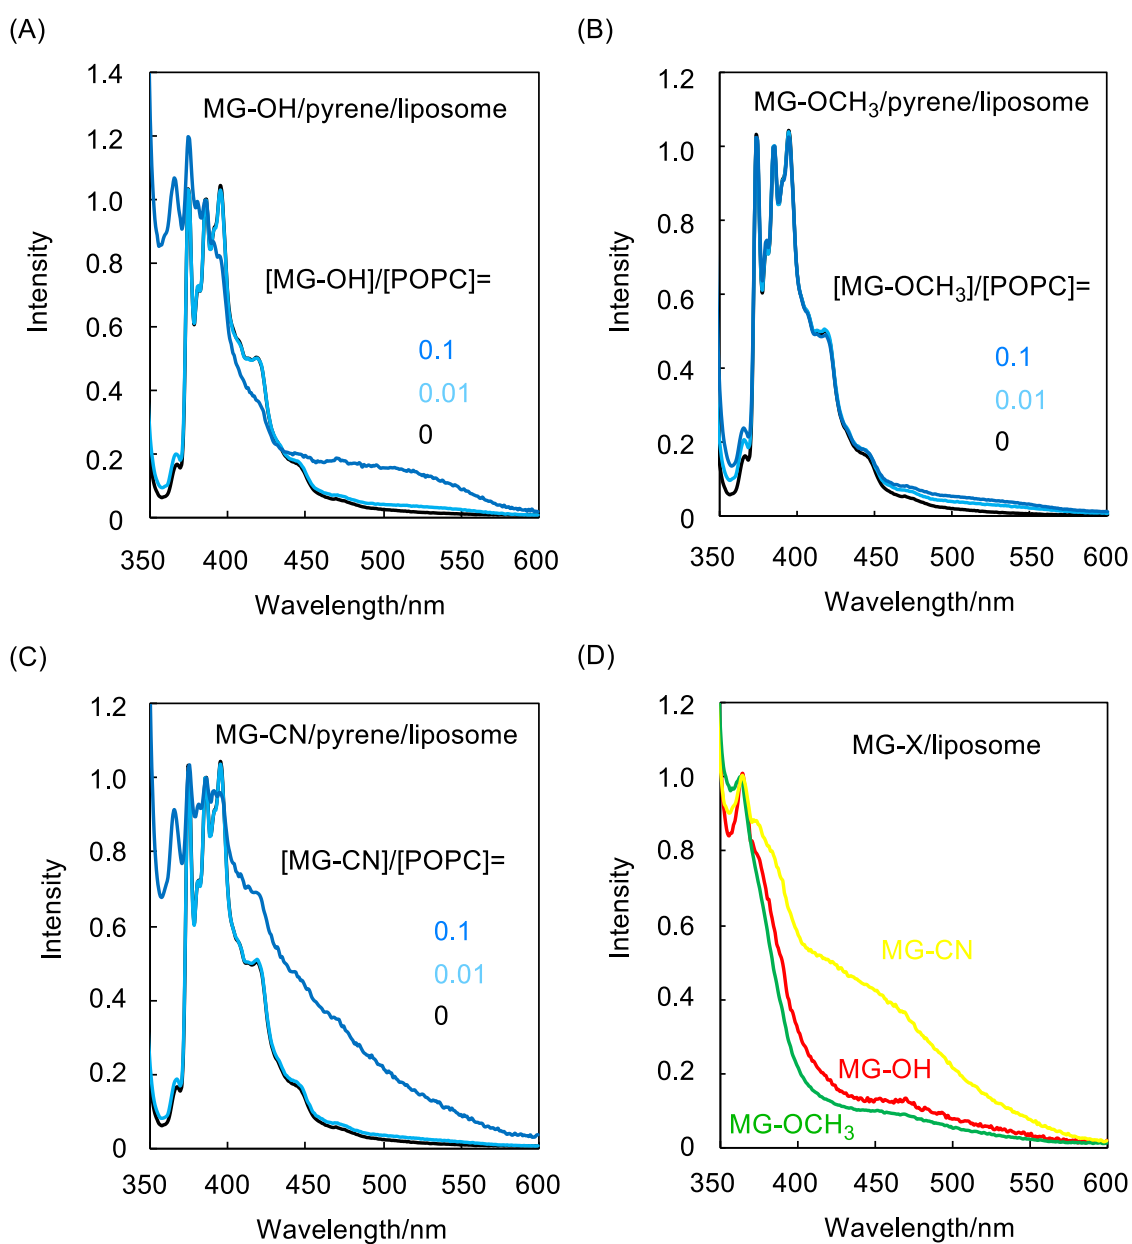

**Figure S4.** Fluorescence spectra of MG-X/pyrene/POPC liposome. (A) MG-CN, (B) MG-OCH<sub>3</sub>, (C) MG-CN. [POPC] = 9.3-9.8 mM, [pyrene] = 0.5 μM.  $\lambda_{\text{ex}}$  = 337 nm. Fluorescence intensity was calibrated to the third vibronic peak of pyrene (385 nm) which is essentially insensitive to polarity.<sup>1)</sup> Fluorescence spectra of MG-X/POPC liposomes (D). [POPC] = 9.3-9.8 mM, [MG-X]/[POPC] = 0.1.  $\lambda_{\text{ex}}$  = 337 nm. Fluorescence intensity was calibrated to the peak at 363 nm which was assigned to the emission from MG-X.<sup>2)</sup>

Pyrene is a lipophilic compound solubilized inside the lipid membrane. The fluorescence intensity ratio of the first and third vibronic peaks of pyrene (I1/I3) has an extreme sensitivity to the polarity of an environment. The I1/I3 ratio in POPC liposome was observed to be around 1.03, which is comparable to the reported values in phospholipid bilayers.<sup>3)</sup> Pyrene has also been known to form an exciplex with *N,N*-dimethylaniline which was observed at 520 nm in the fluorescence spectrum.<sup>4)</sup> The fluorescence intensity at 520 nm increased with the MG-OH concentrations in the MG-OH/pyrene/POPC liposome (Figure S4(A)), while the MG-OH/POPC liposome did not present an emission peak around 520 nm (Figure S4(D)). MG-OH is considered to be located at the same lipophilic conditions as pyrene, i.e. lipid membrane. MG-OCH<sub>3</sub>/pyrene/POPC liposome exhibited a slight increase in fluorescence intensity around 520 nm (Figure S4(B)).

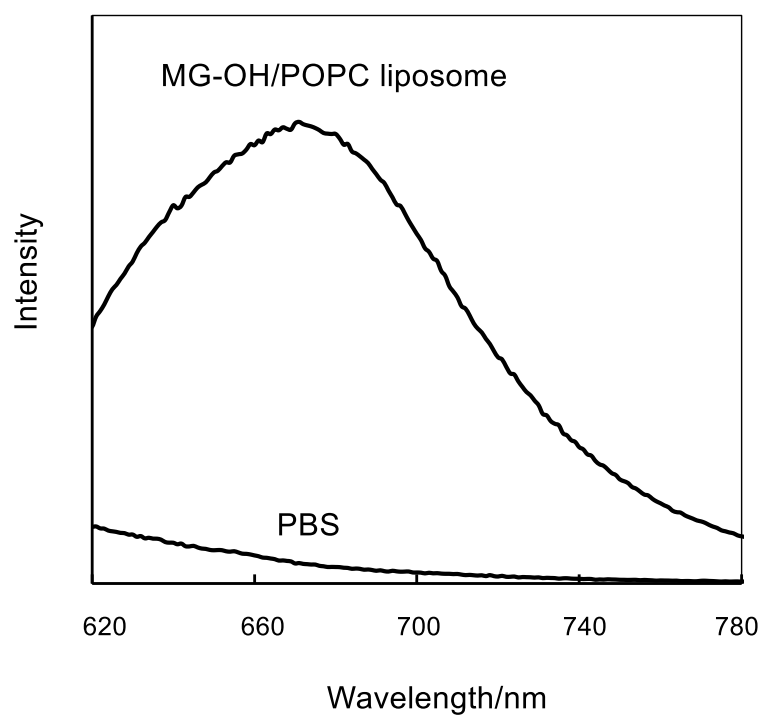

**Figure S5.** Fluorescence spectra of Colon 26 cells after incubation for 2 h treated with MG-OH/POPC liposomes and PBS.  $\lambda_{\text{ex}} = 590$  nm.

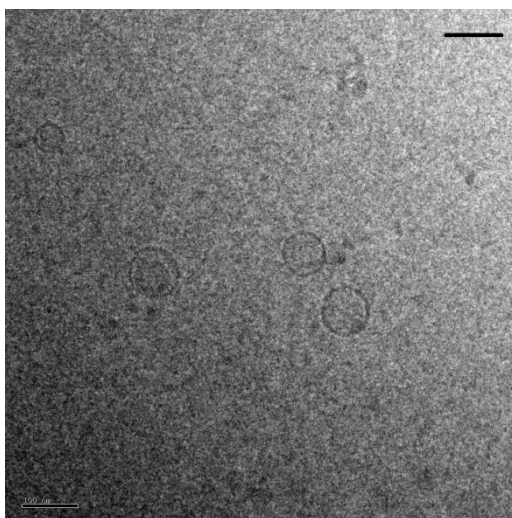

**Figure S6.** Cryo-transmission electron micrograph of MG-OH/POPC liposomes ( $[MG-OH]/[POPC] = 0.1$ ). Bar = 100 nm.



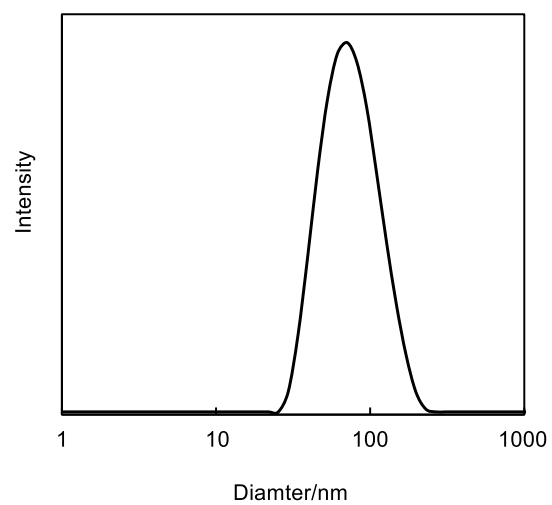

**Figure S7.** Size distribution of MG-OH/POPC liposomes measured using DLS ( $[MG-OH]/[POPC] = 0.1$ ).

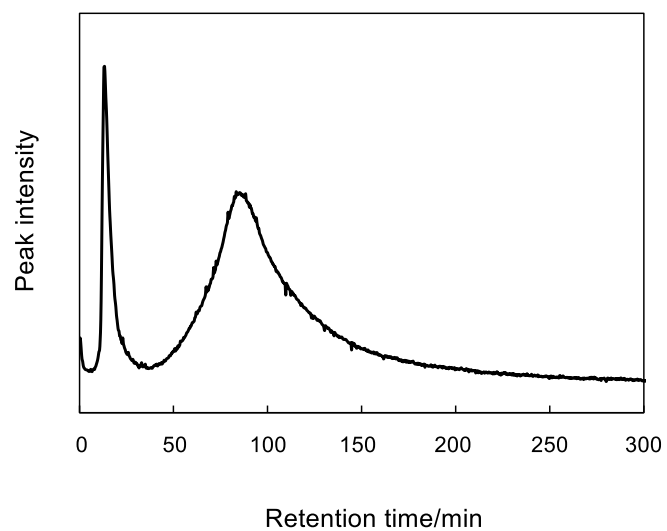

**Figure S8.** Typical chromatogram of the MG-OH/POPC liposomes ( $[MG-OH]/[POPC] = 0.1$ ) in phosphate buffer solutions at pH 6.0.

## References

- 1) K. Kalyanasundaram, J. K. Thomas, *J. Am. Chem. Soc.* 1977, **99**, 2039; D. S. Karpovich, G. J. Blanchard, *J. Phys. Chem.* 1995, **99**, 3951.
- 2) R. M. Uda, D. Yamashita, Y. Sakurai, K. Kimura, *Langmuir* 2007, **23**, 7936.
- 3) D. Arrais, J. Martins, *Biochim. Biophys. Acta*, 2007, **1768**, 2914; E. A. Lissi, E. Abuin, M. Saez, A. Zanocco, A. Disalvo, *Langmuir* 1992, **8**, 348.
- 4) K. Sen, S. Bandyopadhyay, D. Bhattacharya, S. Basu, *J. Phys. Chem. A* 2001, **105**, 9077.
